# Supplementary material
Source: PubMed Central journal article supplement (PMC2797078)
Supplement: NIHMS162569-supplement-Individual_Results.pdf [file NIHMS162569-supplement-Individual_Results.pdf]

## Supplementary material

Morphological and volumetric information for all 30 humans and 30 chimpanzees studied in the present investigation.

| Human | Hem   | DS       | IPCS          | IFS      | AR                         | POP Vol |
|-------|-------|----------|---------------|----------|----------------------------|---------|
| 1     | Left  | c/ar/ifs | 1 seg         | 2 seg    | vertical(hr)               | 7.05    |
|       | Right | c/ifs    | 1 seg         | 2 seg(m) | vertical(hr)               | 8.27    |
| 2     | Left  | c/ifs    | 1 seg         | 1seg     | vertical                   | 6.13    |
|       | Right | x        | 1 seg         | 1 seg    | vertical                   | 1.85    |
| 3     | Left  | n/c      | 1 seg         | 2 seg    | vertical(hr)               | 3.12    |
|       | Right | c/ifs    | 1 seg         | 1 seg(b) | oblique                    | 3.93    |
| 4     | Left  | x        | 1 seg         | 1 seg(b) | vertical                   | 3.93    |
|       | Right | c/ifs    | 1 seg         | 1 seg(b) | vertical                   | 6.28    |
| 5     | Left  | x        | 1 seg         | 2 seg(m) | vertical                   | 3.48    |
|       | Right | n/c      | 1 seg         | 1 seg    | diagonal                   | 5.30    |
| 6     | Left  | n/c      | 1 seg         | 1 seg    | vertical                   | 4.58    |
|       | Right | n/c      | 1 seg         | 2 seg    | vertical                   | 6.85    |
| 7     | Left  | n/c      | 1 seg         | 2 seg    | vertical                   | 9.48    |
|       | Right | n/c      | 2<br>seg(v/a) | 1 seg    | vertical                   | 5.42    |
| 8     | Left  | c/ifs    | 1 seg         | 2 seg    | diagonal(l)<br>vertical(m) | 7.86    |
|       | Right | c/ar     | 1 seg         | 2 seg    | vertical                   | 6.43    |
| 9     | Left  | n/c      | 1 seg         | 1 seg    | vertical                   | 6.63    |
|       | Right | n/c      | 1 seg         | 1 seg    | vertical                   | 6.70    |
| 10    | Left  | n/c      | 1 seg         | 1 seg    | vertical                   | 4.40    |
|       | Right | n/c      | 1 seg         | 2 seg    | vertical                   | 2.77    |
| 11    | Left  | c/ar     | 1 seg         | 1 seg    | diagonal(l)<br>vertical(m) | 4.25    |
|       | Right | x        | 1 seg         | 1 seg    | vertical                   | 3.92    |
| 12    | Left  | x        | 1 seg         | 2 seg    | vertical                   | 3.70    |
|       | Right | n/c      | 2             | 2 seg    | vertical                   | 3.64    |

|    |       |                | seg(m/a<br>) |          |              |      |
|----|-------|----------------|--------------|----------|--------------|------|
| 13 | Left  | x              | 1 seg        | 2 seg    | vertical     | 3.14 |
|    | Right | c/ar           | 1 seg        | 2 seg    | vertical     | 4.54 |
| 14 | Left  | c/ipcs         | 1 seg        | 2 seg(m) | vertical     | 4.56 |
|    | Right | n/c            | 1 seg        | 1 seg    | oblique(hr)  | 5.16 |
| 15 | Left  | x              | 1 seg        | 1 seg    | vertical(hr) | 2.51 |
|    | Right | c/ar           | 1 seg        | 1 seg    | vertical     | 4.40 |
| 16 | Left  | c/ifs          | 1 seg        | 2 seg    | vertical     | 7.47 |
|    | Right | n/c            | 1 seg        | 2 seg    | vertical     | 3.64 |
| 17 | Left  | c/ifs/ipc<br>s | 1 seg        | 2 seg(m) | vertical     | 4.98 |
|    | Right | c/ipcs         | 1 seg        | 1 seg    | vertical     | 5.72 |
| 18 | Left  | c/ifs          | 1 seg        | 1 seg    | vertical     | 7.30 |
|    | Right | c/ifs          | 1 seg        | 1 seg    | vertical     | 6.56 |
| 19 | Left  | c/ar/ifs       | 1 seg        | 2 seg    | vertical     | 5.22 |
|    | Right | c/ifs          | 1 seg        | 2 seg    | vertical     | 2.21 |
| 20 | Left  | c/ar           | 1 seg        | 2 seg    | oblique      | 2.80 |
|    | Right | c/ar           | 1 seg        | 2 seg    | oblique      | 6.53 |
| 21 | Left  | c/ar           | 1 seg        | 1 seg    | oblique      | 4.21 |
|    | Right | c/ifs          | 1 seg        | 1 seg    | vertical     | 7.84 |
| 22 | Left  | n/c            | 1 seg        | 1 seg    | vertical     | 4.62 |
|    | Right | x              | 1 seg        | 1 seg    | vertical     | 3.58 |
| 23 | Left  | x              | 1 seg        | 1 seg    | vertical(b)  | 3.70 |
|    | Right | n/c            | 1 seg        | 1 seg    | vertical(m)  | 4.48 |
| 24 | Left  | n/c            | 1 seg        | 2 seg(m) | diagonal     | 4.14 |
|    | Right | c/ar           | 1 seg        | 1 seg    | diagonal     | 5.16 |
| 25 | Left  | c/ar           | 1 seg        | 1 seg    | vertical     | 6.68 |
|    | Right | c/ar/hr        | 1 seg        | 1seg     | vertical(hr) | 5.41 |
| 26 | Left  | n/c            | 1 seg        | 1 seg    | vertical     | 5.04 |
|    | Right | c/ifs/ipc<br>s | 1 seg        | 1seg     | vertical     | 7.56 |
| 27 | Left  | c/ar           | 1 seg        | 1 seg(b) | vertical     | 6.49 |
|    | Right | n/c            | 2            | 1 seg    | diagonal(l)  | 4.87 |

|    |       |        | seg(v/a) |          | vertical(m) |      |
|----|-------|--------|----------|----------|-------------|------|
| 28 | Left  | x      | 1 seg    | 1 seg(b) | vertical    | 2.78 |
|    | Right | c/ipcs | 1 seg    | 2 seg    | vertical    | 4.79 |
| 29 | Left  | x      | 1 seg    | 1 seg(b) | vertical    | 3.69 |
|    | Right | x      | 1 seg    | 1 seg(b) | vertical    | 3.41 |
| 30 | Left  | x      | 1 seg    | 1 seg    | vertical    | 4.83 |
|    | Right | x      | 1 seg    | 2 seg(m) | vertical    | 2.90 |

| Chimpanzee | Hem   | IPCS  | IFS   | FO    | POP Vol              |
|------------|-------|-------|-------|-------|----------------------|
| 1          | Left  | 2 seg | 1 seg | 1 seg | 0.77<br>1.68         |
|            | Right | 2 seg | 1 seg | 1 seg | 1.26<br>2.28         |
| 2          | Left  | 1 seg | 1 seg | 1 seg | 1.12                 |
|            | Right | 3 seg | 1 seg | 1 seg | 1.24<br>2.04<br>2.20 |
| 3          | Left  | 1 seg | 1 seg | 1 seg | 1.41                 |
|            | Right | 1 seg | 1 seg | 1 seg | 1.63                 |
| 4          | Left  | 1 seg | 1 seg | 1 seg | 1.00                 |
|            | Right | 1 seg | 1 seg | 1 seg | 1.24                 |
| 5          | Left  | 1 seg | 1 seg | 1 seg | 0.90                 |
|            | Right | 1 seg | 1 seg | 1 seg | 0.75                 |
| 6          | Left  | 1 seg | 1 seg | 1 seg | 1.26                 |
|            | Right | 1 seg | 1 seg | 1 seg | 1.22                 |
| 7          | Left  | 1 seg | 1 seg | 1 seg | 0.96                 |
|            | Right | 1 seg | 1 seg | 1 seg | 0.73                 |
| 8          | Left  | 1 seg | 1 seg | 1 seg | 1.75                 |
|            | Right | 1 seg | 1 seg | 1 seg | 1.09                 |
| 9          | Left  | 2 seg | 1 seg | 1 seg | 1.21<br>1.66         |
|            | Right | 1 seg | 1 seg | 1 seg | 1.29                 |
| 10         | Left  | 1 seg | 1 seg | 1 seg | 1.04                 |
|            | Right | 1 seg | 1 seg | 1 seg | 0.68                 |

|    |       |       |          |            |              |
|----|-------|-------|----------|------------|--------------|
| 11 | Left  | 1 seg | 1 seg(b) | 1 seg      | 1.72         |
|    | Right | 1 seg | 2 seg(b) | 1 seg      | 0.99         |
| 12 | Left  | 1 seg | 1 seg    | 1 seg      | 1.45         |
|    | Right | 1 seg | 1 seg    | 1 seg      | 0.74         |
| 13 | Left  | 1 seg | 2 seg    | 1 seg      | 0.92         |
|    | Right | 1 seg | 2 seg    | 1 seg      | 1.15         |
| 14 | Left  | 2 seg | 1 seg    | 1 seg      | 0.50<br>0.89 |
|    | Right | 1 seg | 2 seg    | 1 seg      | 1.13         |
| 15 | Left  | 1 seg | 1 seg    | 1 seg      | 0.83         |
|    | Right | 1 seg | 1 seg    | 1 seg      | 1.06         |
| 16 | Left  | 1 seg | 1 seg    | 1 seg      | 1.04         |
|    | Right | 1 seg | 2 seg    | 1 seg      | 1.47         |
| 17 | Left  | 1 seg | 1 seg    | 1 seg      | 1.20         |
|    | Right | 1 seg | 1 seg    | 1 seg      | 1.52         |
| 18 | Left  | 1 seg | 1 seg    | 1 seg      | 1.69         |
|    | Right | 1 seg | 1 seg    | 1 seg      | 1.93         |
| 19 | Left  | 1 seg | 1 seg    | 2 seg      | 1.14         |
|    | Right | 1 seg | 1 seg    | 1 seg      | 0.89         |
| 20 | Left  | 1 seg | 2 seg    | 1 seg      | 1.57         |
|    | Right | 1 seg | 1 seg    | 1 seg      | 1.03         |
| 21 | Left  | 2 seg | 2 seg    | 1 seg      | 0.58<br>0.95 |
|    | Right | 2 seg | 2 seg    | 1 seg      | 1.21<br>1.67 |
| 22 | Left  | 1 seg | 1 seg    | 1 seg      | 1.08         |
|    | Right | 1 seg | 1 seg    | 1 seg      | 1.42         |
| 23 | Left  | 2 seg | 1 seg    | 1 seg, hfo | 1.24<br>1.45 |
|    | Right | 2 seg | 1 seg    | 1 seg      | 1.39<br>1.87 |
| 24 | Left  | 1 seg | 1 seg    | 3 seg      | 1.39         |
|    | Right | 1 seg | 1 seg    | 1 seg      | 1.13         |

|    |       |       |       |       |                      |
|----|-------|-------|-------|-------|----------------------|
| 25 | Left  | 1 seg | 2 seg | 1 seg | 1.14                 |
|    | Right | 1 seg | 1 seg | 1 seg | 0.79                 |
| 26 | Left  | 2 seg | 1 seg | 1 seg | 0.78<br>1.26         |
|    | Right | 1 seg | 1 seg | 1 seg | 0.85                 |
| 27 | Left  | 1 seg | 1 seg | 1 seg | 1.60                 |
|    | Right | 1 seg | 2 seg | 1 seg | 2.03                 |
| 28 | Left  | 3 seg | 1 seg | 1 seg | 0.73<br>1.69<br>2.37 |
|    | Right | 2 seg | 1 seg | 2 seg | 1.31<br>2.51         |
| 29 | Left  | 2 seg | 1 seg | 1 seg | 0.56<br>1.06         |
|    | Right | 1 seg | 1 seg | 1 seg | 0.82                 |
| 30 | Left  | 1 seg | 1 seg | 1 seg | 1.05                 |
|    | Right | 2 seg | 1 seg | 2 seg | 0.99<br>1.55         |

Key for Tables:

ar = anterior ascending ramus of the Sylvian fissure

c/ar = connection with ar

c/ar/ifs = connection with ar and ifs

c/ifs = connections with ifs

c/ipcs = connection with ipcs

c/ifs/ipcs = connection at the junction between ifs and ipcs

diagonal = ar is diagonal (\)

fo = fronto-orbital sulcus

hfo = horizontal fronto-orbital sulcus

hr = anterior horizontal ramus of the Sylvian fissure

ifs = inferior frontal sulcus

ipcs = inferior precentral sulcus

n/c = no connection

oblique = ar is curved and does not branch off hr

oblique(hr) = ar is curved and branches off hr

seg = segment

seg(b) = bridge of cortex separates ifs from ipcs

seg(m) = multiple segments appearing only medially (not on brain's surface)

seg(m/a) = additional medial segment, anterior segment taken for measurement

seg(v/a) = additional ventral segment, anterior segment taken for measurement

vertical = ar is vertical and does not branch off hr

vertical(b) = ar is vertical and is bifid dorsally

vertical(hr) = ar is vertical and branches off hr

vertical(m) = ar is vertical appearing only medially (not on brain's surface)

x = no sulcus
